# Supplementary material for: Older Adults’ Access to Care during the COVID-19 Pandemic: Results from the LOckdown and LifeSTyles (LOST) in Lombardia Project
Source: MDPI journal article supplement (doi:10.3390/ijerph191811271), 2022-09-07
Supplement: s1 [file s1]

**Supplementary Table S1.** Prevalence of healthcare demand behaviour according to selected characteristics, adjusted prevalence ratios (PRs) and corresponding 95% confidence intervals (CI)\*, among the subgroup of 3,521 subjects with at least one chronic condition.

|                                                   | Cancellation/postponement<br>of scheduled visits |                          | Reduction of ED access |                          | Reduction of<br>hospitalisations |                          |
|---------------------------------------------------|--------------------------------------------------|--------------------------|------------------------|--------------------------|----------------------------------|--------------------------|
|                                                   | Prev. (n)                                        | PR <sup>1</sup> (95% CI) | Prev. (n)              | PR <sup>1</sup> (95% CI) | Prev. (n)                        | PR <sup>1</sup> (95% CI) |
| <b>Overall</b>                                    | 26.7 (940)                                       |                          | 8.0 (282)              |                          | 6.1 (217)                        |                          |
| <b>Sex</b>                                        |                                                  |                          |                        |                          |                                  |                          |
| Women                                             | 24.8 (520)                                       | <sup>12</sup>            | 7.7 (163)              | <sup>12</sup>            | 5.8 (124)                        | <sup>12</sup>            |
| Men                                               | 29.4 (420)                                       | <b>1.20 (1.07-1.34)</b>  | 8.3 (119)              | 1.12 (0.89-1.41)         | 6.5 (93)                         | 1.16 (0.89-1.51)         |
| <b>Age group</b>                                  |                                                  |                          |                        |                          |                                  |                          |
| 65-74                                             | 24.7 (373)                                       | <sup>12</sup>            | 6.4 (97)               | <sup>12</sup>            | 4.4 (66)                         | <sup>12</sup>            |
| ≥75                                               | 28.3 (567)                                       | <b>1.13 (1.01-1.27)</b>  | 9.2 (185)              | <b>1.56 (1.21-1.99)</b>  | 7.5 (151)                        | <b>1.90 (1.42-2.55)</b>  |
| <b>Marital status</b>                             |                                                  |                          |                        |                          |                                  |                          |
| Divorced/widowed/single                           | 26.4 (280)                                       | <sup>12</sup>            | 7.5 (80)               | <sup>12</sup>            | 5.5 (60)                         | <sup>12</sup>            |
| Married                                           | 26.8 (660)                                       | 1.15 (0.93-1.42)         | 8.2 (202)              | 0.85 (0.59-1.23)         | 6.4 (157)                        | 0.86 (0.56-1.31)         |
| <b>Number of household components</b>             |                                                  |                          |                        |                          |                                  |                          |
| 1                                                 | 28.2 (230)                                       | <sup>12</sup>            | 6.4 (53)               | <sup>12</sup>            | 4.6 (39)                         | <sup>12</sup>            |
| 2                                                 | 27.1 (587)                                       | 0.86 (0.68-1.08)         | 7.7 (168)              | <b>1.58 (1.02-2.45)</b>  | 6.2 (134)                        | <b>1.76 (1.06-2.94)</b>  |
| ≥3                                                | 22.7 (123)                                       | <b>0.76 (0.58-0.99)</b>  | 11.3 (61)              | <b>2.47 (1.55-3.92)</b>  | 8.1 (44)                         | <b>2.59 (1.50-4.46)</b>  |
| <i>P for trend</i>                                |                                                  | <b>0.035</b>             |                        | <b>&lt;0.001</b>         |                                  | <b>&lt;0.001</b>         |
| <b>Education level</b>                            |                                                  |                          |                        |                          |                                  |                          |
| None or primary school                            | 25.7 (180)                                       | <sup>12</sup>            | 9.5 (67)               | <sup>12</sup>            | 6.8 (48)                         | <sup>12</sup>            |
| Secondary                                         | 25.9 (329)                                       | 1.02 (0.87-1.20)         | 6.6 (84)               | 0.74 (0.54-1.01)         | 5.5 (70)                         | 0.86 (0.60-1.24)         |
| High school/Degree                                | 27.8 (431)                                       | 1.07 (0.91-1.25)         | 8.4 (131)              | 0.94 (0.70-1.27)         | 6.3 (99)                         | 1.02 (0.72-1.45)         |
| <i>P for trend</i>                                |                                                  | <b>0.065</b>             |                        | <b>0.917</b>             |                                  | <b>0.711</b>             |
| <b>Self-reported economic status</b>              |                                                  |                          |                        |                          |                                  |                          |
| Low                                               | 21.7 (140)                                       | <sup>12</sup>            | 10.5 (68)              | <sup>12</sup>            | 6.5 (42)                         | <sup>12</sup>            |
| Medium                                            | 26.6 (691)                                       | <b>1.31 (1.11-1.55)</b>  | 7.2 (189)              | 0.85 (0.57-1.27)         | 5.8 (152)                        | 0.73 (0.48-1.11)         |
| High                                              | 39.5 (109)                                       | <b>1.89 (1.53-2.34)</b>  | 9.1 (25)               | 1.26 (0.80-1.98)         | 8.4 (23)                         | 0.80 (0.48-1.33)         |
| <i>P for trend</i>                                |                                                  | <b>&lt;0.001</b>         |                        | <b>0.074</b>             |                                  | <b>0.582</b>             |
| <b>Number of comorbidities</b>                    |                                                  |                          |                        |                          |                                  |                          |
| 1                                                 | 20.9 (267)                                       | <sup>12</sup>            | 7.0 (90)               | <sup>12</sup>            | 5.4 (69)                         | <sup>12</sup>            |
| 2                                                 | 28.9 (414)                                       | <b>1.44 (1.26-1.65)</b>  | 7.6 (109)              | 1.11 (0.85-1.46)         | 5.5 (79)                         | 1.02 (0.74-1.39)         |
| ≥3                                                | 32.3 (259)                                       | <b>1.57 (1.35-1.82)</b>  | 10.2 (83)              | <b>1.47 (1.10-1.96)</b>  | 8.5 (69)                         | <b>1.55 (1.11-2.15)</b>  |
| <i>P for trend</i>                                |                                                  | <b>&lt;0.001</b>         |                        | <b>0.012</b>             |                                  | <b>0.013</b>             |
| <b>COVID-19 infection</b>                         |                                                  |                          |                        |                          |                                  |                          |
| No                                                | 26.6 (897)                                       | <sup>12</sup>            | 7.9 (266)              | <sup>12</sup>            | 6.0 (205)                        | <sup>12</sup>            |
| Yes                                               | 28.5 (43)                                        | 0.92 (0.72-1.19)         | 10.5 (16)              | 1.31 (0.81-2.11)         | 7.9 (12)                         | 1.3 (0.75-2.27)          |
| <b>Anxiety symptoms (GAD-2) in 2019</b>           |                                                  |                          |                        |                          |                                  |                          |
| No (<3)                                           | 26.9 (826)                                       | <sup>12</sup>            | 8.1 (249)              | <sup>12</sup>            | 6.2 (190)                        | <sup>12</sup>            |
| Yes (≥3)                                          | 25.0 (114)                                       | 0.95 (0.80-1.14)         | 7.2 (33)               | 0.91 (0.63-1.3)          | 5.8 (27)                         | 0.96 (0.65-1.44)         |
| <b>Change in anxiety symptoms 2020 vs 2019</b>    |                                                  |                          |                        |                          |                                  |                          |
| Unchanged (<3 in both periods)                    | 26.2 (636)                                       | <sup>12</sup>            | 7.6 (185)              | <sup>12</sup>            | 5.9 (144)                        | <sup>12</sup>            |
| Unchanged (≥3 in both periods)                    | 25.3 (102)                                       | 1.00 (0.83-1.20)         | 6.6 (27)               | 0.9 (0.6-1.34)           | 5.6 (23)                         | 0.97 (0.63-1.51)         |
| Worsened                                          | 30.0 (190)                                       | <b>1.19 (1.04-1.36)</b>  | 10.1 (64)              | <b>1.33 (1.01-1.75)</b>  | 7.2 (46)                         | 1.22 (0.88-1.69)         |
| Improved                                          | 22.9 (12)                                        | 0.99 (0.60-1.63)         | 11.1 (6)               | 1.52 (0.70-3.29)         | 7.4 (4)                          | 1.32 (0.50-3.48)         |
| <b>Depressive symptoms (PHQ-2) in 2019</b>        |                                                  |                          |                        |                          |                                  |                          |
| No (<3)                                           | 26.9 (861)                                       | <sup>12</sup>            | 8.2 (263)              | <sup>12</sup>            | 6.3 (203)                        | <sup>12</sup>            |
| Yes (≥3)                                          | 24.9 (79)                                        | 0.95 (0.77-1.17)         | 5.8 (19)               | 0.72 (0.45-1.15)         | 4.3 (14)                         | 0.68 (0.39-1.17)         |
| <b>Change in depressive symptoms 2020 vs 2019</b> |                                                  |                          |                        |                          |                                  |                          |
| Unchanged (<3 in both periods)                    | 26.2 (740)                                       | <sup>12</sup>            | 8.1 (228)              | <sup>12</sup>            | 6.2 (177)                        | <sup>12</sup>            |
| Unchanged (≥3 in both periods)                    | 24.9 (66)                                        | 0.96 (0.77-1.20)         | 5.1 (14)               | 0.64 (0.37-1.10)         | 3.6 (10)                         | 0.57 (0.30-1.09)         |
| Worsened                                          | 31.7 (121)                                       | <b>1.20 (1.02-1.40)</b>  | 9.1 (35)               | 1.14 (0.81-1.60)         | 6.7 (26)                         | 1.10 (0.73-1.65)         |
| Improved                                          | 24.6 (13)                                        | 1.06 (0.65-1.72)         | 9.2 (5)                | 1.25 (0.53-2.95)         | 7.7 (4)                          | 1.32 (0.51-3.39)         |

GAD-2: Generalized Anxiety Disorder; PHQ-2: Patient Health Questionnaire.

<sup>1</sup>Estimated through weighted log-binomial regression models adjusted by sex, age group, marital status, education level, number of household components, self-reported economic status, number of chronic diseases, and self-reported COVID-19 infection.

<sup>2</sup>Reference category.
